# Supplementary material
Source: Springer Nature journal article supplement (https://www.springermedizin.de/resource/supplementary/12958_2013_1151_MOESM7_ESM.pdf/9566920)

(A)

12 h

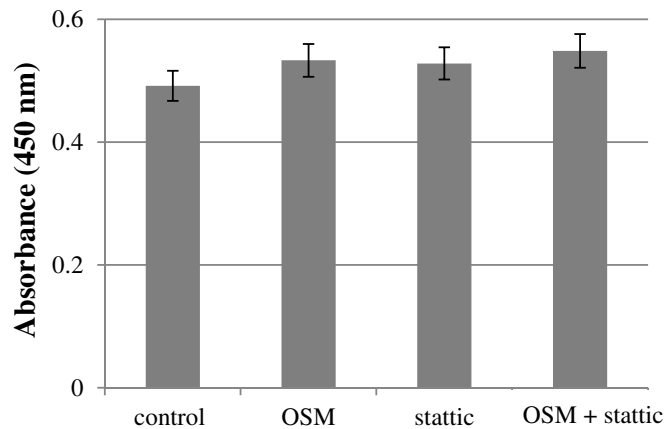

(B)

48 h

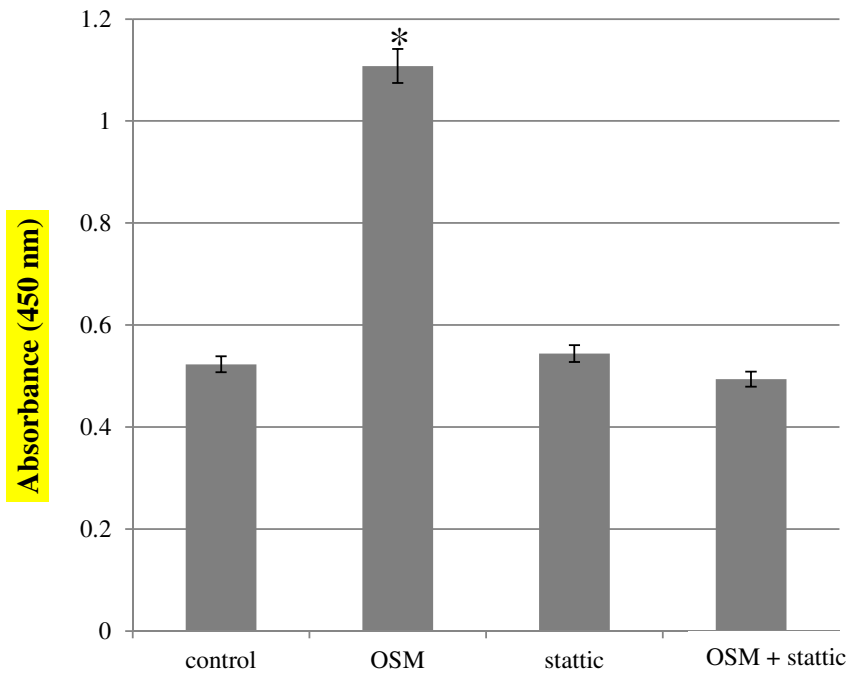

Supplement: MOESM7 [file 9566920]
